# Supplementary material for: A facile in situ hydrophobic layer protected selective etching strategy for the synchronous synthesis/modification of hollow or rattle-type silica nanoconstructs
Source: Royal Society of Chemistry journal article supplement (doi:10.1039/c2jm31504a), 2012-01-01
Supplement: c2jm31504a.pdf [file c2jm31504a.pdf]

Electronic Supplementary Information

10

**A Facile *in-situ* Hydrophobic Layer Protected Selective Etching Strategy for the Synchronous Synthesis/Modification of Hollow or Rattle-type Silica Nanoconstruct**

15 Kun Zhang,<sup>a</sup> Hangrong Chen,<sup>\*a</sup> Yuanyi Zheng,<sup>b</sup> Yu Chen,<sup>a</sup> Ming Ma,<sup>a</sup> Xia Wang,<sup>a</sup> Lijun Wang,<sup>a</sup> and Jianlin Shi<sup>\*a</sup>

<sup>a</sup> State Key Laboratory of High Performance Ceramics and Superfine Microstructure; Shanghai Institute of Ceramics, Chinese Academy of Sciences; No.1295 Ding-xi Road, Shanghai; 200050 (P.R.China).

20

<sup>b</sup> Second Affiliated Hospital of Chongqing Medical University; No.6 Lin-jiang Road, Chongqing, 400010 (P. R. China).

\*author for correspondence. Email address: [hrchen@mail.sic.ac.cn](mailto:hrchen@mail.sic.ac.cn), and [jlshi@summ.shcnc.ac.cn](mailto:jlshi@summ.shcnc.ac.cn)  
Tel: (+86)021-5241-2706. Fax: (+86)21-5241-3122

25

30

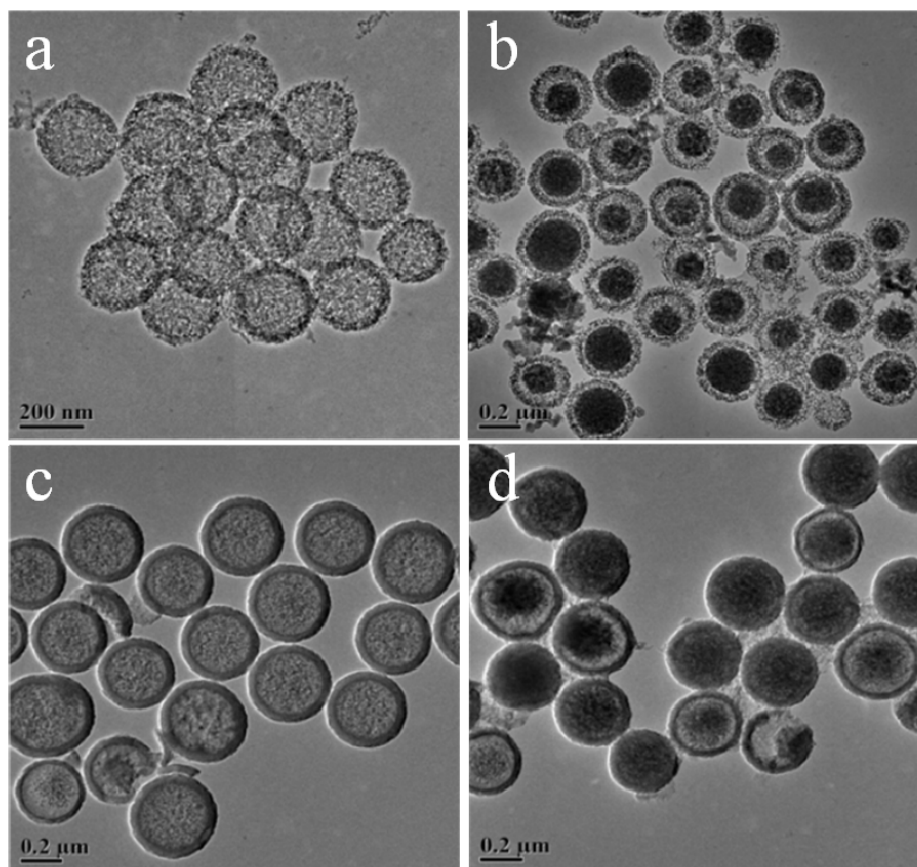

**Figure S1.** a, b) TEM images of HMSNs and RMSNs obtained from PDES, respectively; c, d) TEM images of HMSNs and RMSNs obtained from TSD, respectively.

35

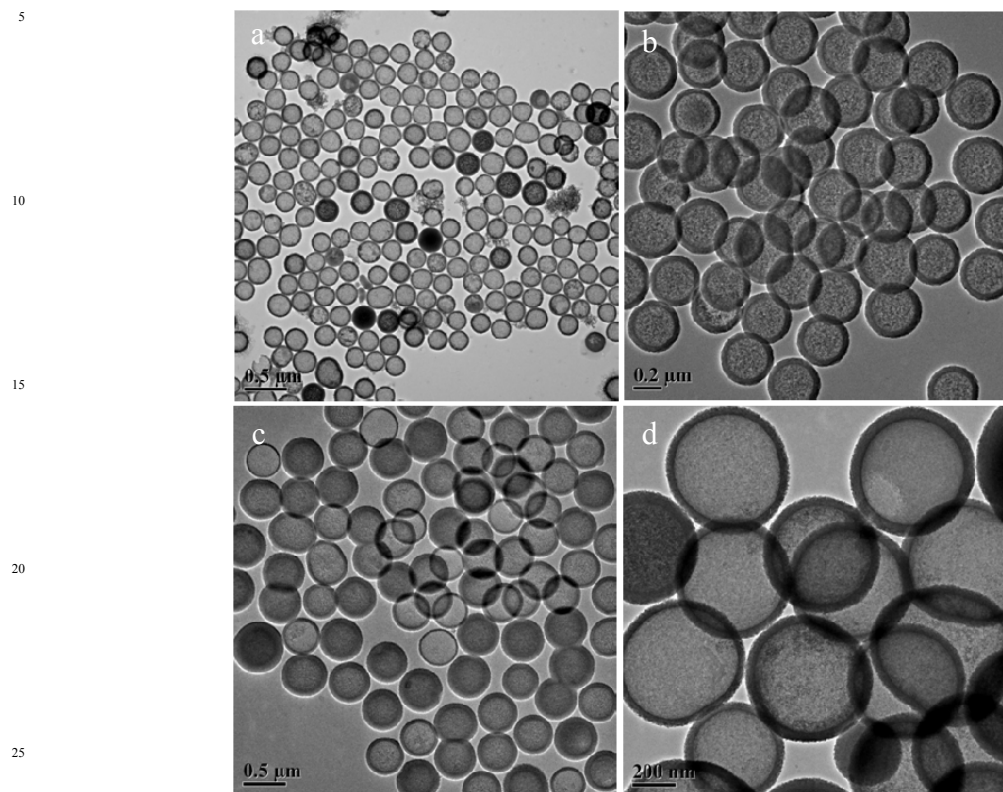

**Figure S2.** TEM images of HMSNs with a series of different particles size and with their shell functionalized with amino groups from TSD by tuning the adding method and reaction time in initially added TEOS: (a) dropwise adding and for 10min, (b) one-pot adding and for 23min, (c) twice-step adding with 8min interval and for 18min, (d) twice-step adding with 13min interval and for 30min.

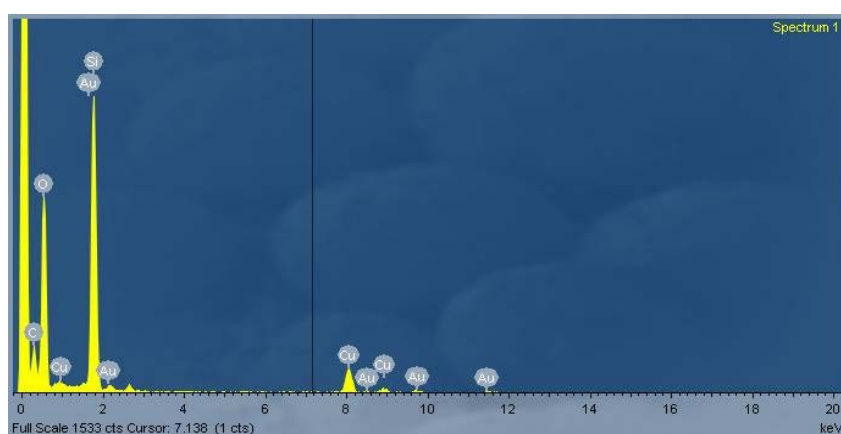

**Figure S3.** EDS spectra of Au@HMSN/Au on the Cu plate without gold sputtering

5

10

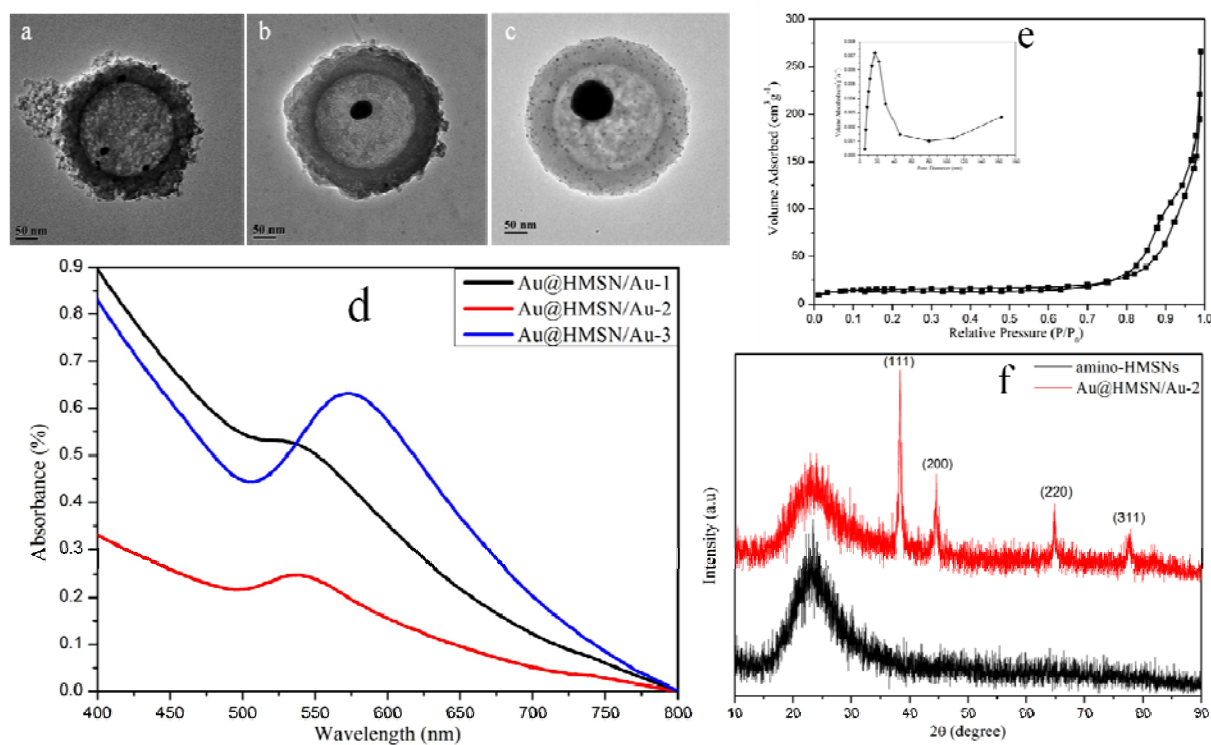

**Figure S4.** TEM images of Au@HMSN/Au nanoparticles with different sizes of Au nanoparticles, (a) Au@HMSN/Au-1 obtained under 100 mg of amino-HMSNs reacting with 10ml of HAuCl<sub>4</sub> (0.0125 M) for 1 h; (b) Au@HMSN/Au-2 nanoparticles obtained under 100mg of amino-HMSNs reacting with 15 ml of HAuCl<sub>4</sub> (0.025 M) for 1 h; (c) Au@HMSN/Au-3 nanoparticles obtained under 400 mg amino-HMSNs reacting with 15ml of HAuCl<sub>4</sub> (0.05 M) for 2 h; (d) UV-vis absorption spectra of Au@HMSN/Au-1, Au@HMSN/Au-2 and Au@HMSN/Au-3; (e) N<sub>2</sub> adsorption-desorption isotherms of Au@HMSN/Au-2, and the inset representing the corresponding pore size distributions of Au@HMSN/Au-2; (f) Wide-angle XRD patterns of Au@HMSN/Au-2 nanoparticles and amino-HMSNs

25

5

10

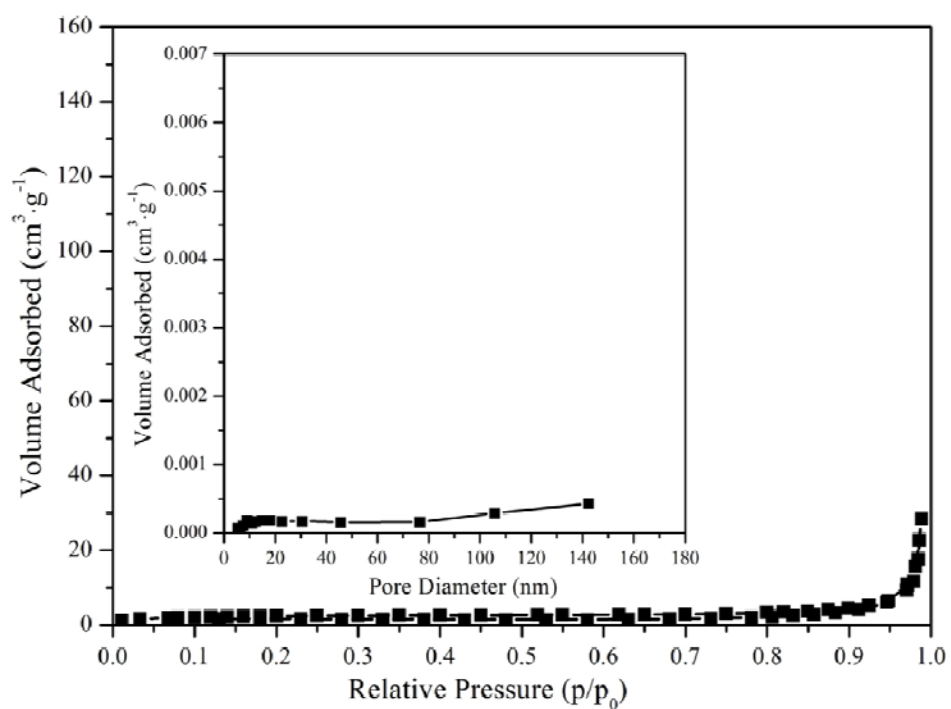

15 **Figure S5.** N<sub>2</sub> adsorption-desorption isotherms of s-SiO<sub>2</sub>/h-SiO<sub>2</sub>, and its pore size distribution (the inset) without any dissolution of solid silica inner core (s-SiO<sub>2</sub>) inner core.

20

25

5

10

15

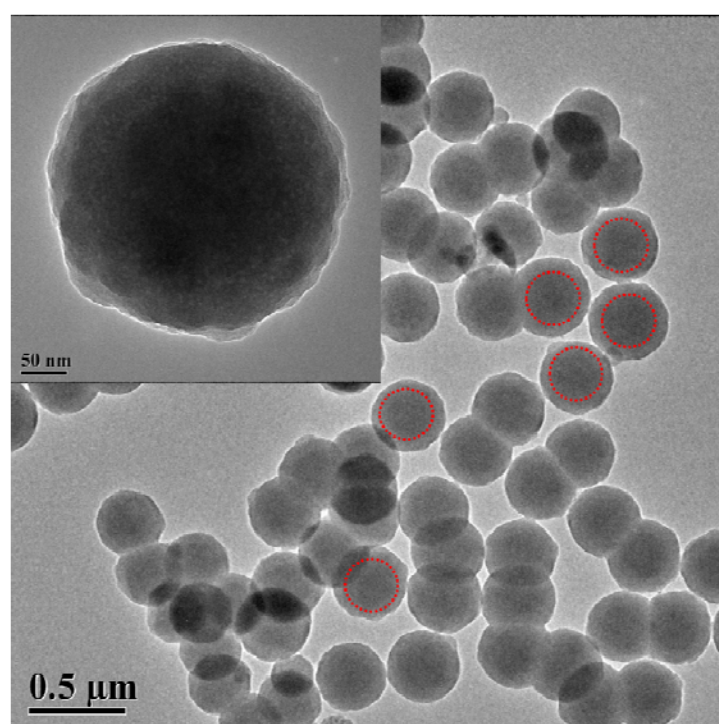

**Figure S6.** TEM images of  $s\text{-SiO}_2/h\text{-SiO}_2$  without any dissolution of solid silica inner core ( $s\text{-SiO}_2$ ) ; the size of inner core is  $280 \pm 10$  nm. The inner core was indicated with red dotted line-labeled circles.

20

25

30

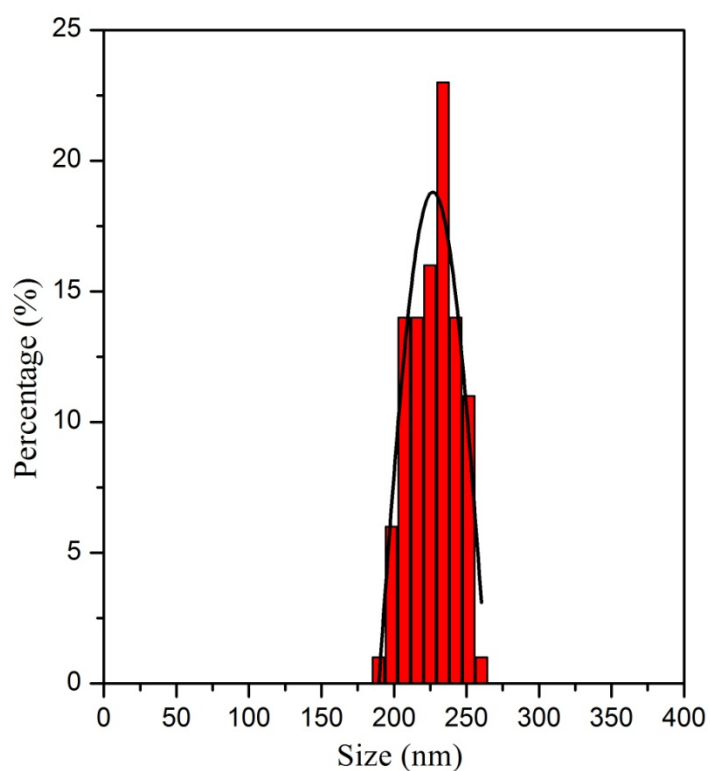

Figure S7. Size distribution of inner core in RMSNs obtained by measuring the inner core sizes of 100 nanoparticles in RMSN TEM images.
